# Supplementary material
Source: PubMed Central journal article supplement (PMC5554462)

**Figure E1. Distribution of Age at Asthma Diagnosis in ACCESS**

**Figure E2. Relationships of combined prenatal and postnatal stress with child PFT z-scores** Effect estimates (differences) and 95% confidence intervals of PFT z-scores comparing each combination of prenatal–postnatal stress. High stress is indicated by a negative life events (NLEs) score  $\geq 5$ , and low stress is indicated by a negative life events score of  $< 5$ . PFT z-scores adjusted for age, sex, height, and race. Models adjusted for maternal education and child's asthma diagnosis (yes/no).

**Percent Diagnosed with Asthma**

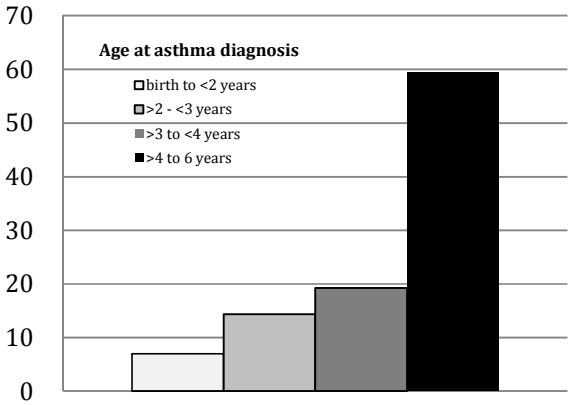

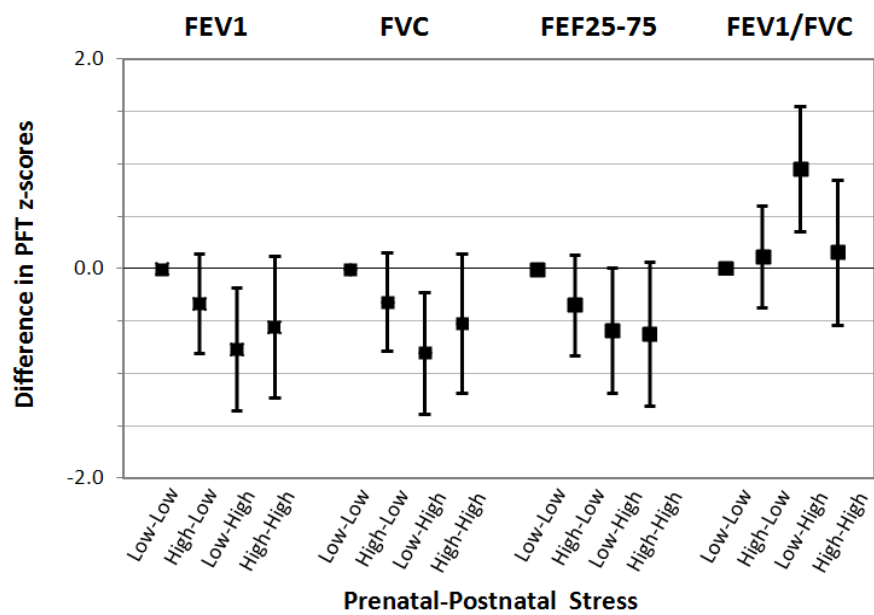

Supplement: NIHMS882637-supplement-supplement_1.pdf [file NIHMS882637-supplement-supplement_1.pdf]
